# Supplementary material
Source: publisher figshare collection journal article supplement (https://acs.figshare.com/ndownloader/files/4766254)
Supplement: Supplementary file 1 [file 4766254]

Supporting information for:

**Time resolved *in situ* combined video/XANES/UV-Vis spectroscopy on the  
influence of X-rays on aqueous copper solutions**

J. Gerbrand Mesu, Andrew M. Beale, Frank M. F. de Groot and Bert M. Weckhuysen<sup>\*</sup>

Inorganic Chemistry and Catalysis, Department of Chemistry, Utrecht University

Sorbonnelaan 16, 3584 CA Utrecht, The Netherlands

### **ESI Movie S1**

*In situ* video movie during the exposure of an aqueous solution containing 100 mM of a Cu<sup>2+</sup>-histidine (1:2) complex at pH 3.4 to the X-ray beam. The movie is rendered at 2000% of the original speed. The beam enters the cuvette from approximately 50 % of the way up the right hand side of the image.

### **ESI Movie S2**

*In situ* video movie during the exposure of an aqueous solution containing 100 mM of a Cu<sup>2+</sup>-histidine (1:2) complex at pH 6.0 to the X-ray beam. The movie is rendered at 2000% of the original speed. The beam enters the cuvette from approximately 50 % of the way up the right hand side of the image.

### **ESI Movie S3**

*In situ* video movie during the exposure of an H<sub>2</sub>O:NMP (1:1) solution containing 20 mM of a Cu<sup>2+</sup>-neocuproine (1:2) complex to the X-ray beam. The movie is rendered at 2000% of the original speed. The beam enters the cuvette from approximately 50 % of the way up the right hand side of the image.

**Table S1.** Ligands, of which the copper complexes were tested for its susceptibility towards reduction under influence of the X-ray beam. The redox potentials, copper precursor salt type, copper concentration and metal-to-ligand ratio are indicated in the table.

| Ligand      | Reduction Potential (mV) | Counter anion                 | [Cu] in mM | Cu:L | Reduction Product                            |
|-------------|--------------------------|-------------------------------|------------|------|----------------------------------------------|
| Neocuproine | +594                     | SO <sub>4</sub> <sup>2-</sup> | 20         | 1:2  | Cu <sup>+</sup>                              |
| Imidazole   | +317                     | SO <sub>4</sub> <sup>2-</sup> | 100        | 1:4  | Cu <sup>0</sup>                              |
|             |                          | SO <sub>4</sub> <sup>2-</sup> | 100        | 1:6  | Cu <sup>0</sup>                              |
|             |                          | Cl <sup>-</sup>               | 100        | 1:4  | Cu <sup>0</sup>                              |
|             |                          | Cl <sup>-</sup>               | 100        | 1:6  | Cu <sup>0</sup>                              |
| Ammonium    | +308                     | NO <sub>3</sub> <sup>-</sup>  | 100        | 1:20 | No Reduction                                 |
|             |                          | SO <sub>4</sub> <sup>2-</sup> | 100        | 1:20 | No Reduction                                 |
|             |                          | Cl <sup>-</sup>               | 100        | 1:20 | Cu <sup>0</sup>                              |
| Pyridine    | +304                     | SO <sub>4</sub> <sup>2-</sup> | 100        | 1:4  | No Reduction                                 |
|             |                          | SO <sub>4</sub> <sup>2-</sup> | 100        | 1:6  | No Reduction                                 |
|             |                          | Cl <sup>-</sup>               | 100        | 1:10 | Cu <sup>0</sup>                              |
|             |                          | SO <sub>4</sub> <sup>2-</sup> | 20         | 1:6  | Cu <sup>0</sup>                              |
|             |                          | SO <sub>4</sub> <sup>2-</sup> | 20         | 1:10 | Cu <sup>0</sup>                              |
|             |                          | Cl <sup>-</sup>               | 20         | 1:10 | Cu <sup>0</sup>                              |
| Terpyridine | -80                      | SO <sub>4</sub> <sup>2-</sup> | 100        | 1:2  | No Reduction                                 |
|             |                          | Cl <sup>-</sup>               | 20         | 1:2  | No Reduction                                 |
| Glycine     | -160                     | Cl <sup>-</sup>               | 20         | 1:2  | Cu <sup>0</sup>                              |
|             |                          | SO <sub>4</sub> <sup>2-</sup> | 100        | 1:2  | No Reduction                                 |
| Histidine   | -170                     | Cl <sup>-</sup>               | 100        | 1:2  | Cu <sup>0</sup>                              |
|             |                          | SO <sub>4</sub> <sup>2-</sup> | 20         | 1:2  | Cu <sup>0#</sup>                             |
|             |                          | SO <sub>4</sub> <sup>2-</sup> | 100        | 1:2  | Cu <sup>0</sup> but slower than <sup>#</sup> |
